# Supplementary material
Source: PubMed Central journal article supplement (PMC11028062)
Supplement: 262_2019_2311_MOESM1_ESM.pdf [file 262_2019_2311_MOESM1_ESM.pdf]

## Supplementary Figure 1

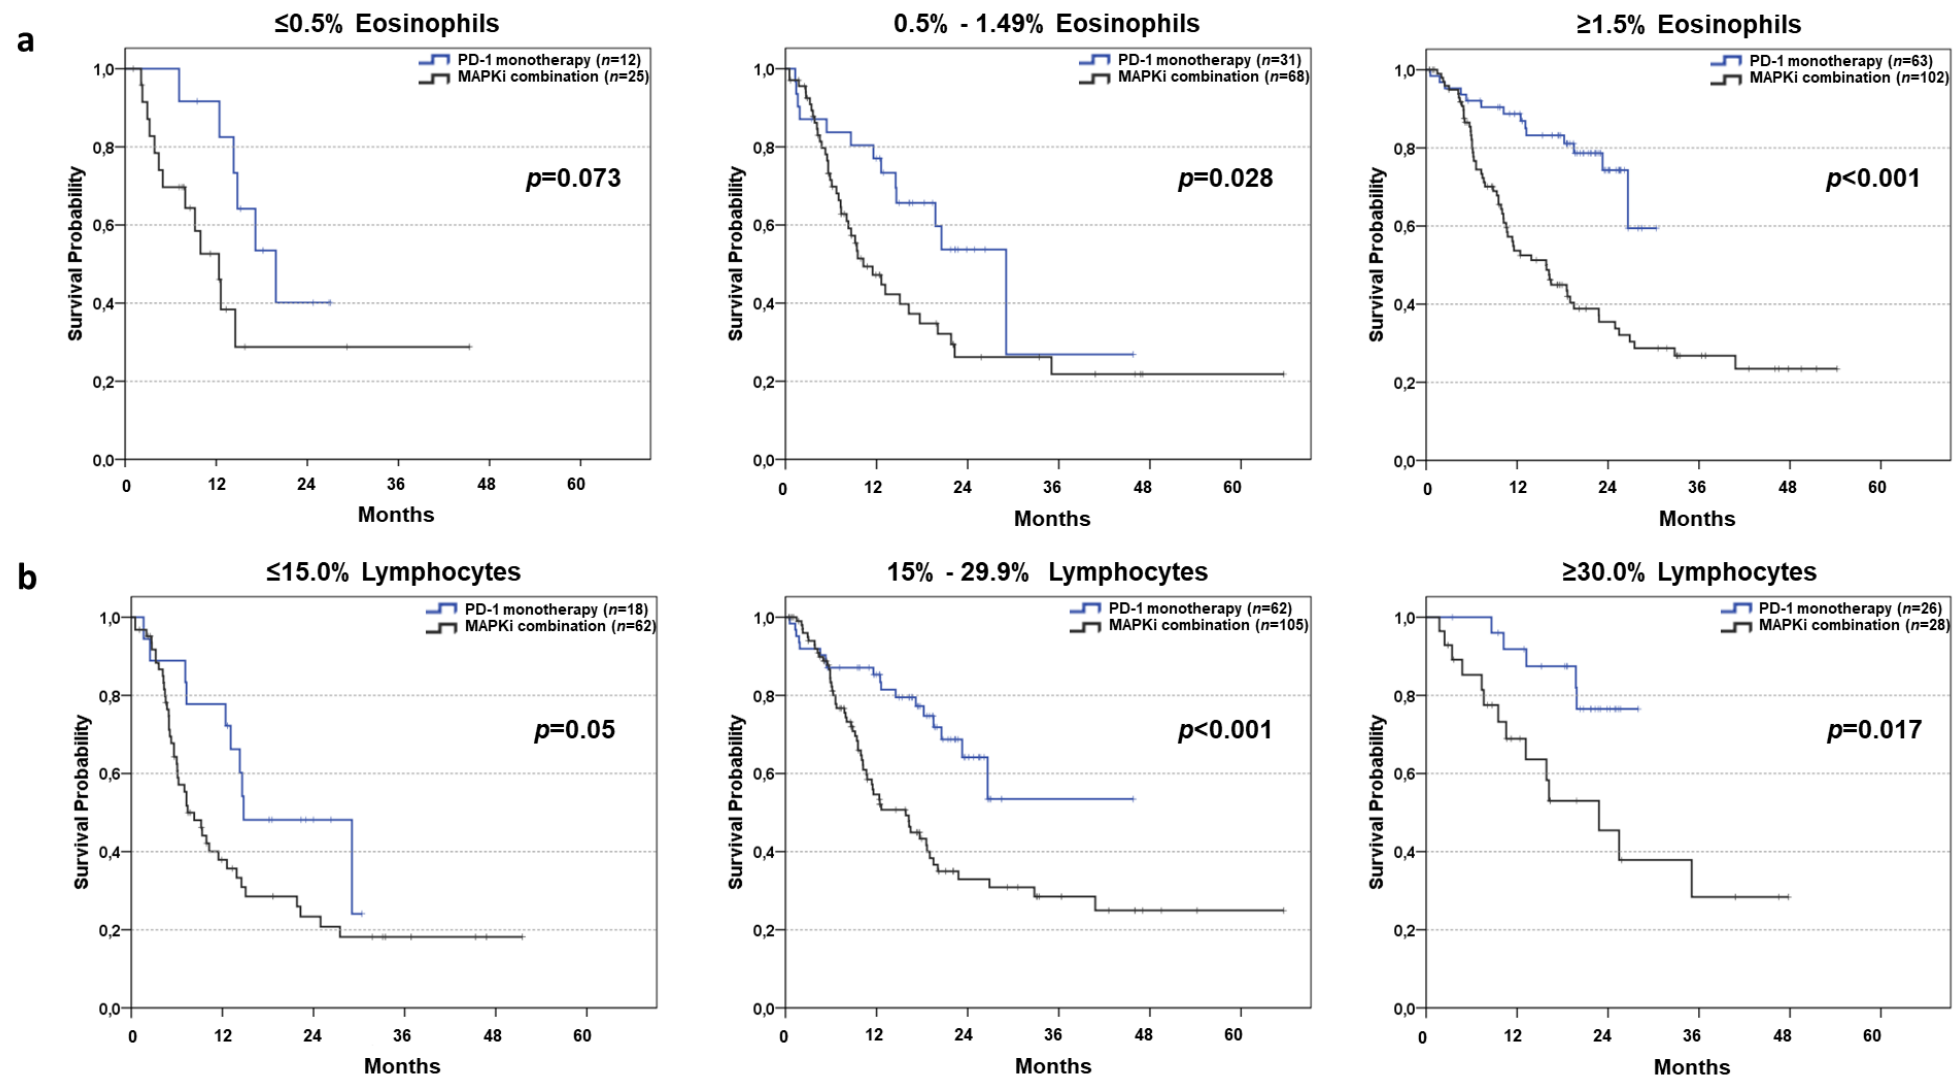

**Supplementary Figure 1: Subgroup analyses of overall survival based on relative frequency of different immune populations in the peripheral blood.** (a) Kaplan-Meier curves for OS are shown for BRAF mutated melanoma patients with ≤0.5% eosinophils (a, left), 0.5% - 1.49% eosinophils (a, middle), or ≥1.5% eosinophils (a, right) circulating in the peripheral blood of patients treated with PD-1 blocking antibodies or dual MAPKi. (b) Kaplan-Meier curves for OS are shown for BRAF mutated melanoma patients with ≤15.0% lymphocytes (b, left), 15% - 29.9% lymphocytes (b, middle), or ≥30.0% lymphocytes (b, right) circulating in the peripheral blood of patients treated with PD-1 blocking antibodies or dual MAPKi. Vertical lines indicate censored values:  $p$ -values were calculated by log rank testing.
